# Supplementary material for: Dynamic foot function as a risk factor for lower limb overuse injury: a systematic review
Source: Springer Nature journal article supplement (doi:10.1186/s13047-014-0053-6), 2014-01-01
Supplement: MOESM3 [file 7114354]

|                                                                           |      |      |      |      |     |      |      |      |      |      |      |      |  |   |
|---------------------------------------------------------------------------|------|------|------|------|-----|------|------|------|------|------|------|------|--|---|
| Q31. Reported reliability of overuse injury measurement                   |      |      |      |      |     |      |      |      |      |      |      |      |  | 0 |
| Q32. Reported validity of overuse injury measurement                      |      |      |      |      |     |      |      |      |      |      |      |      |  | 0 |
| Q33. Reported standardisation of overuse injury measurement               |      |      |      |      |     |      |      |      |      |      |      |      |  | 5 |
| Q34. Observation time comparability                                       |      |      |      |      |     |      |      |      |      |      |      |      |  | 9 |
| Q35. Reported prior disease/history                                       | -    |      |      |      |     |      |      |      |      |      |      |      |  | 0 |
| Q36. Adjustment for intrinsic variables                                   |      |      |      |      |     |      |      |      |      |      |      |      |  | 0 |
| Q37. Adjustment for extrinsic variables                                   |      |      |      |      |     |      |      |      |      |      |      |      |  | 0 |
| Q38. Is follow up time adequate                                           |      |      |      |      |     |      |      |      |      |      |      |      |  | 6 |
| Q39. Follow up time differences                                           |      |      |      |      |     |      |      |      |      |      |      |      |  | 9 |
| Q40. Reported data for ≥3 levels of associated factors                    |      |      |      |      |     |      |      |      |      |      |      |      |  | 6 |
| Q41. Reported data for subgroups of subjects (e.g. by gender or age)      |      |      |      |      |     |      |      |      |      |      |      |      |  | 4 |
| Q42. Generalisability of results to study population (participation rate) |      |      |      |      |     |      |      |      |      |      |      |      |  | 0 |
| Q43. Generalisability of results to other populations (random sampling)   |      |      |      |      |     |      |      |      |      |      |      |      |  | 0 |
| Overall quality score (range 0 to 2)                                      | 0.83 | 0.44 | 0.84 | 1.03 | 0.8 | 0.71 | 0.69 | 1.20 | 1.09 | 0.97 | 0.74 | 0.74 |  |   |

Good article (1.40 SD +0.30), average article (1.33 SD +23) or poor article (0.90 SD ± 18) from Genaidy et al. [46]
