# Supplementary material for: Dynamic foot function as a risk factor for lower limb overuse injury: a systematic review
Source: Springer Nature journal article supplement (doi:10.1186/s13047-014-0053-6), 2014-01-01
Supplement: MOESM9 [file 7114354]

Figure 2c. Achilles tendinopathy

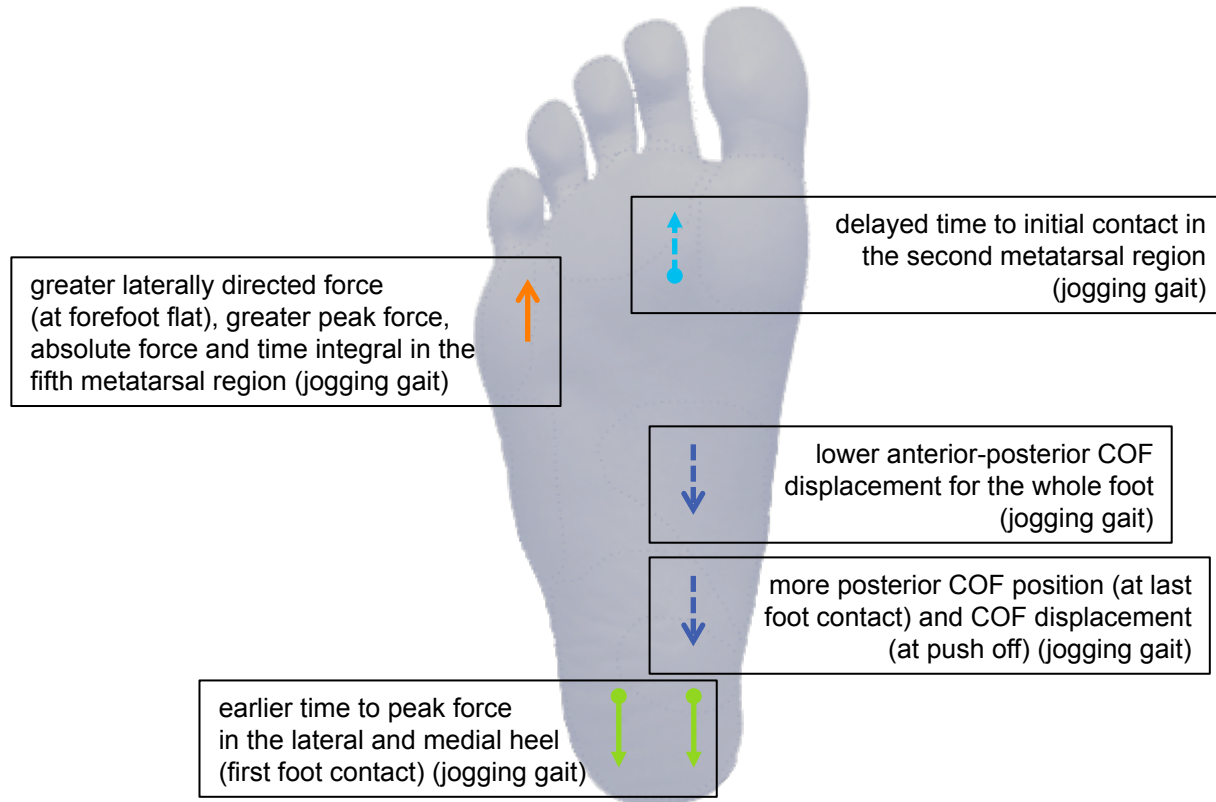

### Legend

|                    |                                                                                     |
|--------------------|-------------------------------------------------------------------------------------|
| Force/pressure     |  |
| Displacement       |  |
| Time to peak force |  |
| Time of contact    |  |
| Lower              |  |
| Earlier            |  |
| Delayed            |  |
