# Supplementary material for: Dynamic foot function as a risk factor for lower limb overuse injury: a systematic review
Source: Springer Nature journal article supplement (doi:10.1186/s13047-014-0053-6), 2014-01-01

A) patellofemoral pain

B) non-specific injuries

medial

lateral

medial

lateral

Greater pronation velocity (left foot);  
less pronation velocity (right foot)

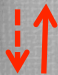

greater maximal  
abduction velocity

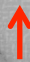

greater maximal eversion  
position; maximal eversion  
excursion; mean eversion  
velocity; time to max eversion;  
max eversion velocity; 3-D  
pronation excursion

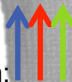

greater max  
re-inversion velocity;  
mean re-inversion  
velocity

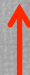

Supplement: MOESM11 [file 7114354]
