# Supplementary material for: Dynamic foot function as a risk factor for lower limb overuse injury: a systematic review
Source: Springer Nature journal article supplement (doi:10.1186/s13047-014-0053-6), 2014-01-01

# Figure 3 Legend

Displacement/excursion

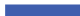

Time to maximal excursion

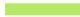

Velocity

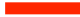

Increased

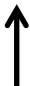

Decreased

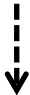

Supplement: MOESM13 [file 7114354]
