# Supplementary figures and images for: Dynamic foot function as a risk factor for lower limb overuse injury: a systematic review
Source: Springer Nature journal article supplement (doi:10.1186/s13047-014-0053-6), 2014-01-01

**Figure 2d. Non-specific injuries**

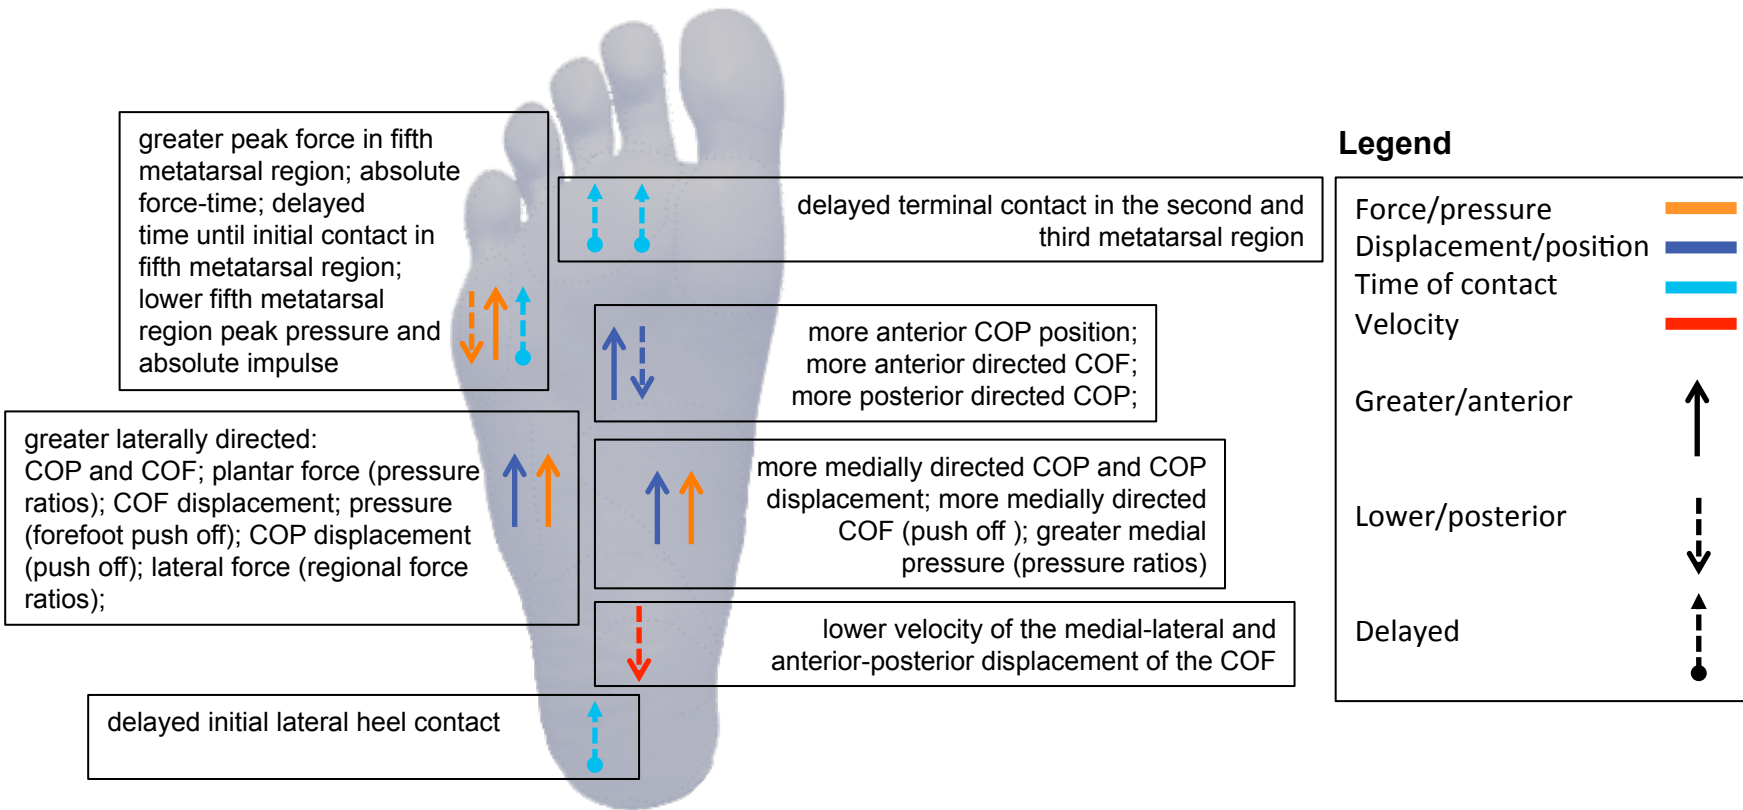

Supplement: MOESM10 [file 7114354]
